# Supplementary material for: Sugarcane Streak Mosaic Virus P1 Attenuates Plant Antiviral Immunity and Enhances Potato Virus X Infection in Nicotiana benthamiana
Source: MDPI journal article supplement (doi:10.3390/cells11182870), 2022-09-14
Supplement: s1 [file s1]

**Supplementary Table S2-List of the specific pairs of primers for selected candidate genes that the corresponding protein directly interacted with the PVX encoded proteins**

| Protein Name <sup>a</sup> | Transcription ID <sup>b</sup> | Primer Sequences (5'-3')  | Length of PCR | T <sub>m</sub> value (°C) <sup>c</sup> |
|---------------------------|-------------------------------|---------------------------|---------------|----------------------------------------|
|                           |                               |                           | Products (bp) |                                        |
| <i>NbeEF1A</i>            | Niben101Scf07423g04011.1      | AAAATCCCCTTTGTCCCC        | 94            | 56.0                                   |
|                           |                               | TTTCGATCATGTTATCACCCCTC   |               | 56.8                                   |
| <i>NbeEF1Bβ-1</i>         | Niben101Scf19454g00004.1      | CTAGCAAAAGCCCCATCA        | 90            | 54.2                                   |
|                           |                               | TCCCCAGATACACCACAGAT      |               | 54.5                                   |
| <i>NbeEF1Bβ-2</i>         | Niben101Scf00337g03005.1      | GTGGCTATACTGAATAACAACAATC | 89            | 55.4                                   |
|                           |                               | GCATAACAGATACCCTTGACGA    |               | 57.2                                   |
| <i>NbTIPs</i>             | Niben101Scf02016g00005.1      | AGGAGGTCCTAAAACTGCTCG     | 92            | 58.1                                   |
|                           |                               | AAACCCCTGTGACATCCATAA     |               | 56.9                                   |
| <i>NbFD1</i>              | Niben101Scf22688g00018.1      | AAACGATTAAAACCCCGAACT     | 88            | 57.8                                   |
|                           |                               | TACGCAACAACCGTGACCT       |               | 56.9                                   |
| <i>NbREM1</i>             | Niben101Scf15568g00037.1      | GTGACGAGCTGAAGTTGATGTA    | 94            | 55.4                                   |
|                           |                               | GTTTTGGCTTTTGTAGTGGC      |               | 55.3                                   |
| <i>NbREM2</i>             | Niben101Scf08587g00002.1      | TCTACCAGCAAGTTGATTCTCC    | 91            | 56.4                                   |
|                           |                               | TCCATCTCCTCCTTACCGT       |               | 56.1                                   |
| <i>NbREM3</i>             | Niben101Scf04804g01002.1      | TGCCTCCTCCTGAACAAGTC      | 86            | 57.2                                   |
|                           |                               | CAGCAGGTTTATCTTCTACGAC    |               | 54.1                                   |
| <i>NbREM4</i>             | Niben101Scf02910g01040.1      | GCCTTAGTCCCATCTGTCAAC     | 91            | 56.2                                   |
|                           |                               | TCTCAGTCTCCACTTTCGTAGC    |               | 56.5                                   |
| <i>NbPlastocyanin</i>     | Niben101Scf00539g07027.1      | CTCTGCTGCTGTTGCTATCC      | 93            | 55.9                                   |
|                           |                               | CTTTCAAAGAAGCCTTCACC      |               | 54.4                                   |
| <i>NbActin-1</i>          | Niben101Scf04140g01010.1      | TGAAGATCAAGGTGGTGGC       | 83            | 56.0                                   |
|                           |                               | TGAAGATCAAGGTGGTGGC       |               | 57.8                                   |

|                   |                          |                                                  |     |              |
|-------------------|--------------------------|--------------------------------------------------|-----|--------------|
| <i>NbActin-2</i>  | Niben101Scf00096g04015.1 | AGGCTACTCTTTCACTACCACG<br>CTTCTCCTTCACATCCCTAACA | 100 | 56.0<br>56.3 |
| <i>NbActin-3</i>  | Niben101Scf03410g03002.1 | TTGCTATTCAGGCTGTGCTC<br>TCATCAGGCTATCGGTAAGG     | 98  | 56.4<br>55.3 |
| <i>NbPCIP1-1</i>  | Niben101Scf03143g06001.1 | GTGGCTATGGAAGTGGAATG<br>TCTGGCTGTACTGACTAGGGTG   | 94  | 55.2<br>57.1 |
| <i>NbPCIP1-2</i>  | Niben101Scf02720g00003.1 | GCCAGTCCACTCACAATCAC<br>CTGCCATAGCCAGCATCAC      | 98  | 55.4<br>57.0 |
| <i>NbPCIP1-3</i>  | Niben101Scf01317g02003.1 | TGATGATGGGTCGTGGTAG<br>GCTTGAAAAGTTGGTGGAGT      | 100 | 53.9<br>54.3 |
| <i>NbMPB2Cb-1</i> | Niben101Scf00337g03002.1 | ATCGTCCCTCTTGTTTCAGTC<br>TTGGTCCCTATGCTTCTTTG    | 98  | 53.6<br>55.4 |
| <i>NbMPB2Cb-2</i> | Niben101Scf01531g03011.1 | TCGTCCCTCTTGTTTCAGTCC<br>TTGGTCCCTATGCTTCTTTG    | 98  | 57.1<br>55.4 |
| <i>NbCPIP1</i>    | Niben101Scf02043g02002.1 | GGGAACTATGAACCTGGAGC<br>CCATCCCTCTTGAAGACAGC     | 85  | 56.1<br>56.9 |
| <i>NbCPIP2</i>    | Niben101Scf06958g01003.1 | GGTGGAGAATAAACTGTCGTGT<br>TGTAGGCTTGCCAGAGTCAT   | 96  | 56.0<br>55.5 |
| <i>NbCPIP3</i>    | Niben101Scf02806g00030.1 | GTTCCCATCAAGGCTTAGTTC<br>GTCAACAGTCCTGCCCAAC     | 94  | 55.8<br>55.4 |
| <i>NbCPIP4</i>    | Niben101Scf07875g00001.1 | CCGTCAAGGCTTAGTTCAGA<br>CATTGCACTTCCACAATCAGTT   | 89  | 55.5<br>57.7 |

<sup>a</sup> General proteins names

<sup>b</sup> The accession number of *N. benthamiana* transcripts database (<https://solgenomics.net>)

<sup>c</sup> The T<sub>m</sub> value of qRT-PCR used in the study
