# Supplementary material for: Sugarcane Streak Mosaic Virus P1 Attenuates Plant Antiviral Immunity and Enhances Potato Virus X Infection in Nicotiana benthamiana
Source: MDPI journal article supplement (doi:10.3390/cells11182870), 2022-09-14
Supplement: s1 [file s1]

**Supplementary Table S6 -Validation of DAPs from P1<sup>SCSMV</sup> heterologous expressed *N. benthamiana* plants obtained from 4D-lable free proteomic by qRT-PCR and western blotting**

| <i>N. benthamiana</i> database | <i>N. benthamiana</i> database | Protein description <sup>c</sup>                | High/Low  | Protein Proteomic |         | qRT-PCR     |         |
|--------------------------------|--------------------------------|-------------------------------------------------|-----------|-------------------|---------|-------------|---------|
| Protein ID <sup>a</sup>        | Transcription ID <sup>b</sup>  |                                                 | abundance | Fold change       | P value | Fold change | p-value |
| NbS00004447g0101.1             | Niben101Scf03993g05005.1       | 5-epi-aristolochene synthase-like (EAS)         | High      | 57.252            | 0.0012  | 24.8274     | 0.0335  |
| NbS00023821g0011.1             | Niben101Scf07491g00003.1       | Endochitinase A                                 | High      | 15.126            | 0.0020  | 23.9518     | 0.0254  |
| NbS00061216g0001.1             | Niben101Scf04053g02006.1       | Pathogenesis-related protein 1 like (PR-1-like) | High      | 18.169            | 0.0044  | 23.587      | 0.1253  |
| NbS00013764g0007.1             | Niben101Scf14996g00009.1       | Catalase (CAT)                                  | High      | 5.494             | 0.0026  | 3.018       | 0.0258  |
| NbS00003017g0007.1             | Niben101Scf10254g01002.1       | Glutathione S-transferase U9-like (GST)         | High      | 3.754             | 0.0070  | 3.112       | 0.0589  |
| NbS00052235g0008.1             | Niben101Scf03026g01009.1       | L-ascorbate oxidase-like isoform X2 (ASO)       | High      | 2.824             | 0.0018  | 2.864       | 0.0078  |
| NbS00023329g0001.1             | Niben101Scf06266g00002.1       | Lycopene beta cyclase, chloroplastic            | Low       | 0.646             | 0.0301  | 0.1531      | 0.0584  |
| NbS00028082g0012.1             | Niben101Scf07163g00020.1       | Cell division protein FtsZ homolog 1 (FtsZ)     | Low       | 0.399             | 0.0278  | 0.2305      | 0.0694  |
| NbS00055576g0008.1             | Niben101Scf00777g04013.1       | PsbP domain-containing protein 5 (PsbP-like)    | Low       | 0.263             | 0.0065  | 0.1463      | 0.0596  |
| NbS00032594g0011.1             | Niben101Scf08364g00011.1       | Dynamin-like protein ARC5 isoform (ARC5)        | Low       | 0.217             | 0.0004  | 0.0186      | 0.0235  |
| NbS00002190g0213.1             | Niben101Scf04084g00005.1       | Aspartic proteinase (ASP)                       | Low       | 0.225             | 0.0044  | 0.0073      | 0.0002  |
| NbS00056252g0003.1             | Niben101Scf00369g05011.1       | Xyloglucan endotransglucosylase (XTH1)          | Low       | 0.208             | 0.0009  | 0.0010      | 0.0025  |

Note: \* represents most significant DAPs

<sup>a</sup> The accession number of *N. benthamiana* protein database.

<sup>b</sup> The accession number of *N. benthamiana* transcripts database.

<sup>c</sup> Target gene description.
