# Supplementary material for: Sugarcane Streak Mosaic Virus P1 Attenuates Plant Antiviral Immunity and Enhances Potato Virus X Infection in Nicotiana benthamiana
Source: MDPI journal article supplement (doi:10.3390/cells11182870), 2022-09-14
Supplement: s1 [file s1]

**Supplementary Table S5 List of KEGG pathways of P1<sup>SCSMV</sup>-induced differently abundant proteins in P1<sup>SCSMV</sup> heterogeneous expressed *Nicotiana benthamiana* leaf by PVX**

| KEGG pathways ID <sup>a</sup> | Term description <sup>b</sup>     | Protein Accession <sup>c</sup> | Fold <sup>d</sup> | P value | Protein Description <sup>e</sup>                        |
|-------------------------------|-----------------------------------|--------------------------------|-------------------|---------|---------------------------------------------------------|
| nta00071                      | Fatty acid degradation            | NbS00018357g0005.1             | 1.570             | 0.0079  | Photosystem I reaction center subunit II, chloroplastic |
|                               |                                   | NbS00007111g0015.1             | 1.698             | 0.0114  | Multifunctional protein                                 |
|                               |                                   | NbS00011268g0007.1             | 1.748             | 0.0007  | Cytosolic acetoacetyl-coenzyme A thiolase               |
|                               |                                   | NbS00023446g0007.1             | 1.536             | 0.0032  | 3-ketoacyl-CoA thiolase 2, peroxisomal                  |
|                               |                                   | NbS00019858g0012.1             | 2.352             | 0.0052  | Acyl-CoA synthetase                                     |
|                               |                                   | NbS00043465g0007.1             | 1.925             | 0.0021  | Long chain acyl-CoA synthetase 8                        |
|                               |                                   | NbS00020451g0001.1             | 1.951             | 0.0313  | 3-ketoacyl CoA thiolase 2                               |
|                               |                                   | NbS00006179g0007.1             | 1.715             | 0.0122  | Acyl-coenzyme A oxidase 4, peroxisomal                  |
| nta00940                      | Phenylpropanoid biosynthesis      | NbS00018742g0017.1             | 2.001             | 0.0012  | 3-ketoacyl CoA thiolase 1                               |
|                               |                                   | NbS00003851g0014.1             | 11.121            | 0.0001  | Peroxidase                                              |
|                               |                                   | NbS00010850g0119.1             | 4.489             | 0.0003  | Chloramphenicol acetyltransferase-like domain           |
|                               |                                   | NbS00002272g0002.1             | 1.572             | 0.0107  | Cinnamate-4-hydroxylase 1                               |
|                               |                                   | NbS00037999g0007.1             | 2.457             | 0.0216  | Phenylalanine ammonia-lyase 1                           |
|                               |                                   | NbS00003479g0020.1             | 2.101             | 0.0003  | Catechol O-methyltransferase                            |
|                               |                                   | NbS00058677g0004.1             | 0.535             | 0.0446  | Beta-D-glucan exohydrolase                              |
|                               |                                   | NbS00019371g0003.1             | 3.193             | 0.0180  | Peroxidase                                              |
| nta04146                      | Peroxisome                        | NbS00058225g0005.1             | 6.282             | 0.0004  | Peroxidase                                              |
|                               |                                   | NbS00012136g0003.1             | 0.603             | 0.0431  | Beta-D-glucan exohydrolase                              |
|                               |                                   | NbS00018998g0013.1             | 3.62              | 0.0406  | Bacterial-induced peroxidase precursor                  |
|                               |                                   | NbS00021119g0007.1             | 1.927             | 0.0189  | 2-hydroxyacyl-CoA lyase                                 |
|                               |                                   | NbC26053601g0004.1             | 1.77              | 0.0284  | Superoxide dismutase [Cu-Zn]                            |
|                               |                                   | NbS00013764g0007.1             | 5.494             | 0.0026  | Catalase isozyme 1                                      |
|                               |                                   | NbS00016456g0007.1             | 2.934             | 0.0007  | Reductases with broad range of substrate specificities  |
|                               |                                   | NbS00011268g0007.1             | 1.536             | 0.0032  | 3-ketoacyl-CoA thiolase 2, peroxisomal                  |
| nta00592                      | Alpha-Linolenic acid metabolism   | NbS00019858g0012.1             | 1.925             | 0.0021  | Long chain acyl-CoA synthetase 8                        |
|                               |                                   | NbS00051044g0009.1             | 3.017             | 0.0027  | Short-chain dehydrogenase                               |
|                               |                                   | NbS00043465g0007.1             | 1.951             | 0.0313  | 3-ketoacyl CoA thiolase 2                               |
|                               |                                   | NbS00020451g0001.1             | 1.715             | 0.0122  | Acyl-coenzyme A oxidase 4, peroxisomal                  |
|                               |                                   | NbS00006179g0007.1             | 2.001             | 0.0012  | 3-ketoacyl CoA thiolase 1                               |
|                               |                                   | NbS00011268g0007.1             | 1.536             | 0.0032  | 3-ketoacyl-CoA thiolase 2, peroxisomal                  |
|                               |                                   | NbS00018357g0005.1             | 1.698             | 0.0114  | Multifunctional protein                                 |
|                               |                                   | NbS00020451g0001.1             | 1.715             | 0.0122  | Acyl-coenzyme A oxidase 4, peroxisomal                  |
| nta00196                      | Photosynthesis - antenna proteins | NbS00043465g0007.1             | 1.951             | 0.0313  | 3-ketoacyl CoA thiolase 2                               |
|                               |                                   | NbS00018742g0017.1             | 2.272             | 0.0064  | Hydroxyacyl-CoA dehydrogenase                           |
|                               |                                   | NbS00006179g0007.1             | 2.001             | 0.0012  | 3-ketoacyl CoA thiolase 1                               |
|                               |                                   | NbS00004910g0006.1             | 1.63              | 0.0373  | Chlorophyll a/b-binding protein                         |
|                               |                                   | NbS00029431g0007.1             | 1.786             | 0.0136  | Chlorophyll a-b binding protein 13, chloroplastic       |
|                               |                                   | NbS00002044g0005.1             | 1.669             | 0.0478  | Chlorophyll a/b binding protein                         |
|                               |                                   | NbS00004085g0015.1             | 1.563             | 0.0236  | Chloroplast pigment-binding protein CP26                |

|          |                                            |                    |        |        |                                                   |
|----------|--------------------------------------------|--------------------|--------|--------|---------------------------------------------------|
|          |                                            | NbS00050671g0012.1 | 1.691  | 0.0032 | Chlorophyll a-b binding protein 36, chloroplastic |
| nta01040 | Biosynthesis of<br>unsaturated fatty acids | NbS00011268g0007.1 | 1.536  | 0.0032 | 3-ketoacyl-CoA thiolase 2, peroxisomal            |
|          |                                            | NbS00020451g0001.1 | 1.715  | 0.0122 | Acyl-coenzyme A oxidase 4, peroxisomal            |
|          |                                            | NbS00043465g0007.1 | 1.951  | 0.0316 | 3-ketoacyl CoA thiolase 2                         |
|          |                                            | NbS00006179g0007.1 | 2.001  | 0.0012 | 3-ketoacyl CoA thiolase 1                         |
| nta04016 | MAPK signaling<br>pathway                  | NbS00061216g0001.1 | 18.169 | 0.0044 | Pathogenesis-related protein 1                    |
|          |                                            | NbS00023821g0011.1 | 15.126 | 0.0020 | Endochitinase A                                   |
|          |                                            | NbS00000307g0001.1 | 8.507  | 0.0266 | Defense-related protein containing SCP domain     |
|          |                                            | NbS00013764g0007.1 | 5.494  | 0.0026 | Catalase isozyme 1                                |
|          |                                            | NbS00024411g0009.1 | 4.236  | 0.0158 | Acidic endochitinase Q                            |
|          |                                            | NbS00010078g0005.1 | 3.089  | 0.0407 | Chitinase 134                                     |

<sup>a</sup> The identifier in reference KEGG pathways of *N. benthamiana*

<sup>b</sup> Name of KEGG pathway enriched with the *N. benthamiana* proteins

<sup>c</sup> Accession number in the *N. benthamiana* protein database

<sup>d</sup> The regulated folds of DAPs compared to PVX-GFP group.

<sup>e</sup> The basic function description of enriched protein
