# Supplementary material for: Sugarcane Streak Mosaic Virus P1 Attenuates Plant Antiviral Immunity and Enhances Potato Virus X Infection in Nicotiana benthamiana
Source: MDPI journal article supplement (doi:10.3390/cells11182870), 2022-09-14
Supplement: s1 [file s1]

**Supplementary Table S4-Differently abundant proteins in P1<sup>SCSMV</sup> heterogeneous expressed *Nicotiana benthamiana* leaf by 4D-label free proteomics.**

| Phytozome/<br>NCBI Accession <sup>a</sup> | Description <sup>b</sup>                              | Sequences<br>coverage (%) <sup>c</sup> | Anova (p) <sup>d</sup> | Fold change <sup>e</sup> |
|-------------------------------------------|-------------------------------------------------------|----------------------------------------|------------------------|--------------------------|
| <b>UP-accumulated proteins (70)</b>       |                                                       |                                        |                        |                          |
| NbS00004447g0101.1                        | 5-epi-aristolochene synthase-like isoform X1          | 40.3                                   | 0.00016                | 57.252                   |
| NbS00061216g0001.1                        | Basic form of pathogenesis-related protein            | 57.0                                   | 0.00440                | 18.169                   |
| NbS00023821g0011.1                        | Endochitinase A                                       | 51.9                                   | 0.00198                | 15.126                   |
| NbS00010282g0017.1                        | Beta-fructofuranosidase                               | 19.6                                   | 0.00078                | 13.421                   |
| NbS00003709g0007.1                        | Glucan endo-1,3-beta-glucosidase                      | 22.5                                   | 0.00464                | 13.288                   |
| NbS00034922g0015.1                        | Glucanase regulator                                   | 47.5                                   | 0.00580                | 12.361                   |
| NbS00045440g0005.1                        | Pathogenesis-related protein R                        | 41.6                                   | 0.00348                | 11.448                   |
| NbS00003851g0014.1                        | Peroxidase                                            | 31.5                                   | 0.00012                | 11.121                   |
| NbS00005426g0113.1                        | NtPRp27                                               | 37.7                                   | 0.00298                | 10.538                   |
| NbS00018563g0001.1                        | Epoxide hydrolase                                     | 40.4                                   | 0.00190                | 8.726                    |
| NbS00000307g0001.1                        | Unnamed protein product                               | 12.0                                   | 0.02662                | 8.507                    |
| NbS00035082g0005.1                        | Oxoglutarate/iron-dependent dioxygenase               | 36.4                                   | 0.00278                | 8.436                    |
| NbS00024994g0004.1                        | CYP92A2v4                                             | 17.4                                   | 0.00544                | 7.403                    |
| NbS00010102g0006.1                        | Secologanin synthase                                  | 19.9                                   | 0.00394                | 7.277                    |
| NbS00058225g0005.1                        | Peroxidase                                            | 26.9                                   | 0.00044                | 6.282                    |
| NbS00010545g0005.1                        | Conserved hypothetical protein                        | 49.2                                   | 0.00200                | 5.549                    |
| NbS00013764g0007.1                        | Catalase isozyme 1                                    | 53.0                                   | 0.00258                | 5.494                    |
| NbS00010447g0101.1                        | Uncharacterized protein                               | 32.4                                   | 0.02996                | 5.384                    |
| NbS00038999g0004.1                        | Pleiotropic drug resistance protein 1                 | 7.9                                    | 0.00256                | 5.224                    |
| NbS00026613g0001.1                        | Osmotin                                               | 35.5                                   | 0.04462                | 5.074                    |
| NbS00013812g0011.1                        | Aminotransferase                                      | 16.2                                   | 0.00214                | 4.639                    |
| NbS00008099g0223.1                        | Glutathione S-transferase                             | 27.8                                   | 0.03430                | 4.524                    |
| NbS00019212g0004.1                        | UDP-glycosyltransferase 74F2 [Vitis vinifera]         | 26.5                                   | 0.00870                | 4.520                    |
| NbS00010850g0119.1                        | Shikimate O-hydroxycinnamoyltransferase-like          | 24.3                                   | 0.00026                | 4.489                    |
| NbS00024411g0009.1                        | Acidic endochitinase Q                                | 56.1                                   | 0.01584                | 4.236                    |
| NbS00053630g0004.1                        | Chloramphenicol acetyltransferase-like                | 13.6                                   | 0.04568                | 3.878                    |
| NbS00013552g0018.1                        | Phenazine biosynthesis-like domain-containing protein | 43.6                                   | 0.01606                | 3.785                    |
| NbS00003017g0007.1                        | Glutathione S-transferase 12                          | 26.5                                   | 0.00698                | 3.754                    |
| NbS00018998g0013.1                        | Bacterial-induced peroxidase precursor                | 21.0                                   | 0.04060                | 3.620                    |
| NbS00034398g0005.1                        | T-complex protein 1 subunit beta                      | 15.1                                   | 0.00536                | 3.594                    |
| NbS00010129g0001.1                        | Glucan endo-1,3-beta-glucosidase                      | 55.3                                   | 0.03116                | 3.563                    |
| NbS00010311g0003.1                        | Hydroxyacylglutathione hydrolase 3                    | 32.0                                   | 0.02120                | 3.451                    |
| NbS00053961g0017.1                        | Lipoxygenase                                          | 19.6                                   | 0.00068                | 3.357                    |
| NbS00019371g0003.1                        | Peroxidase                                            | 13.6                                   | 0.01802                | 3.193                    |
| NbS00010078g0005.1                        | Chitinase                                             | 40.4                                   | 0.04066                | 3.089                    |
| NbS00051044g0009.1                        | Short-chain dehydrogenase                             | 26.1                                   | 0.00270                | 3.017                    |
| NbS00022757g0014.1                        | Methyltransferase                                     | 51.3                                   | 0.02144                | 2.991                    |
| NbS00015135g0014.1                        | Hydroxymethylglutaryl-CoA synthase                    | 34.8                                   | 0.01380                | 2.979                    |
| NbS00037921g0004.1                        | Argininosuccinate lyase                               | 32.5                                   | 0.00024                | 2.947                    |
| NbS00016456g0007.1                        | Dehydrogenase/reductase SDR family member             | 26.1                                   | 0.00068                | 2.934                    |
| NbS00036561g0009.1                        | Proteinase inhibitor isoform                          | 65.4                                   | 0.01252                | 2.891                    |
| NbS00052235g0008.1                        | Ascorbate oxidase precursor                           | 17.9                                   | 0.00184                | 2.824                    |

|                                       |                                                                       |      |         |       |
|---------------------------------------|-----------------------------------------------------------------------|------|---------|-------|
| NbS00010099g0019.1                    | Agmatine deiminase, putative                                          | 22.5 | 0.00908 | 2.734 |
| NP_054530.1                           | Cytochrome b6                                                         | 15.3 | 0.03762 | 2.707 |
| NbS00026556g0002.1                    | Hypothetical protein: hydrolase activity                              | 21.5 | 0.03678 | 2.621 |
| NbS00005033g0013.1                    | ClpP/crotonase-like domain                                            | 15.2 | 0.01772 | 2.531 |
| NbS00000833g0023.1                    | Photosystem I P700 apoprotein A1                                      | 14.6 | 0.04198 | 2.529 |
| NbS00008548g0006.1                    | Alternative oxidase [Nicotiana tabacum]                               | 18.4 | 0.03435 | 2.462 |
| NbS00004500g0004.1                    | Multidrug resistance protein ABC transporter family                   | 18.4 | 0.01190 | 2.457 |
| NbS00037999g0007.1                    | Phenylalanine ammonia-lyase                                           | 18.6 | 0.02158 | 2.457 |
| NbS00017284g0011.1                    | NADP-dependent malic enzyme                                           | 16.2 | 0.04904 | 2.452 |
| NbS00043723g0002.1                    | CYP81B2v2                                                             | 31.9 | 0.01044 | 2.450 |
| NbS00009732g0022.1                    | Monodehydroascorbate reductase                                        | 53.0 | 0.00816 | 2.438 |
| NbS00011370g0002.1                    | Putative endo-1,3(4)-beta-glucanase 2                                 | 7.5  | 0.00714 | 2.414 |
| NbS00023446g0007.1                    | Aldehyde/histidinol dehydrogenase                                     | 18.6 | 0.00518 | 2.352 |
| NbS00019903g0005.1                    | RecName: Full=Pleiotropic drug resistance protein 1                   | 10.2 | 0.00044 | 2.341 |
| NbS00018742g0017.1                    | Enoyl-CoA hydratase                                                   | 19.4 | 0.00640 | 2.272 |
| NP_054517.1                           | Photosystem II protein V                                              | 48.2 | 0.02410 | 2.244 |
| NbS00018522g0009.1                    | Upstream activation factor subunit spp27                              | 23.6 | 0.03010 | 2.230 |
| NbS00000692g0011.1                    | Cinnamyl alcohol dehydrogenase-like protein                           | 33.0 | 0.01306 | 2.221 |
| NbS00031166g0001.1                    | Probable carboxylesterase 17                                          | 50.6 | 0.00018 | 2.214 |
| NbS00010140g0005.1                    | Hypersensitive-induced response protein                               | 24.4 | 0.00024 | 2.185 |
| NbS00001174g0003.1                    | Alanine aminotransferase                                              | 48.7 | 0.00816 | 2.122 |
| NbS00038880g0004.1                    | Fumarase                                                              | 29.7 | 0.00074 | 2.122 |
| NbS00007839g0020.1                    | TOM1-like protein 2                                                   | 22.6 | 0.02214 | 2.113 |
| NbS00003479g0020.1                    | Catechol O-methyltransferase                                          | 55.9 | 0.00034 | 2.101 |
| NbS00005741g0013.1                    | Formate--tetrahydrofolate ligase                                      | 30.1 | 0.04572 | 2.098 |
| NbS00023745g0003.1                    | Glutamate decarboxylase isozyme 3                                     | 23.7 | 0.00774 | 2.072 |
| NbS00006179g0007.1                    | 3-ketoacyl CoA thiolase 1                                             | 40.0 | 0.00120 | 2.001 |
| <b>Down-accumulated proteins (53)</b> |                                                                       |      |         |       |
| NbS00013715g0011.1                    | Riboflavin biosynthesis protein ribBA                                 | 16.8 | 0.02212 | 0.495 |
| NbS00014863g0008.1                    | PREDICTED: Tetratricopeptide-like helical domain                      | 20.6 | 0.01572 | 0.495 |
| NbS00058604g0005.1                    | PREDICTED: coatomer subunit $\beta$ '-2-like                          | 13.4 | 0.04184 | 0.485 |
| NbS00028221g0013.1                    | Pale cress protein                                                    | 18.5 | 0.00878 | 0.477 |
| NbS00014416g0022.1                    | AMPK1_CBM domain-containing protein                                   | 14.5 | 0.02520 | 0.476 |
| NbS00039424g0014.1                    | Protein HOTHEAD-like isoform X2                                       | 18.0 | 0.02575 | 0.471 |
| NbS00057396g0007.1                    | Conserved hypothetical protein                                        | 18.1 | 0.02298 | 0.468 |
| NbS00050387g0001.1                    | PREDICTED: 2-keto-3-deoxy-L-rhamnonate aldolase-like                  | 12.8 | 0.01356 | 0.465 |
| NbS00005939g0108.1                    | Pyrophosphate-energized vacuolar membrane proton pump-like            | 13.2 | 0.03286 | 0.462 |
| NbS00056567g0001.1                    | PREDICTED: Protein BONZAI 1                                           | 14.9 | 0.01358 | 0.462 |
| NbS00038786g0002.1                    | PREDICTED: pentatricopeptide repeat-containing protein                | 13.5 | 0.03030 | 0.459 |
| NbS00012077g0011.1                    | Pectin acetylesterase                                                 | 39.6 | 0.00190 | 0.456 |
| NbS00057798g0003.1                    | GDLS lipase-like chlorogenate-dependent caffeoyltransferase precursor | 19.7 | 0.00282 | 0.456 |
| NbS00006643g0012.1                    | White-brown-complex ABC transporter family                            | 8.2  | 0.02502 | 0.453 |
| NbS00002134g0107.1                    | Tetrapyrrole-binding protein                                          | 12.7 | 0.03138 | 0.451 |
| NbS00021029g0013.1                    | Cycloartenol synthase                                                 | 16.5 | 0.04124 | 0.449 |
| NbS00037540g0010.1                    | GcpE                                                                  | 31.5 | 0.02962 | 0.448 |
| NbS00020149g0020.1                    | Translation factor GUF1 homolog                                       | 8.9  | 0.01726 | 0.444 |
| NbS00039842g0002.1                    | P-glycoprotein                                                        | 5.5  | 0.00138 | 0.441 |
| NbC24809697g0001.1                    | Hypothetical protein MA29G21.11 [Coffea arabica]                      | 12.7 | 0.01194 | 0.439 |
| NbS00024267g0007.1                    | Cleft lip and palate transmembrane protein 1 homolog                  | 11.5 | 0.01424 | 0.435 |

|                    |                                                                   |      |         |       |
|--------------------|-------------------------------------------------------------------|------|---------|-------|
| NbS00008237g0002.1 | Histidinol dehydrogenase                                          | 10.1 | 0.04312 | 0.434 |
| NbS00010232g0013.1 | 29 kDa ribonucleoprotein A                                        | 36.8 | 0.03402 | 0.424 |
| NbS00035939g0004.1 | Aspartic proteinase oryzasin-1 precursor                          | 32.3 | 0.00814 | 0.423 |
| NbS00000740g0117.1 | Putative R3H domain-containing protein 4-like                     | 29.3 | 0.04974 | 0.421 |
| NbS00025206g0014.1 | Fe-S cluster assembly factor HCF101                               | 24.9 | 0.02160 | 0.420 |
| NbS00012577g0009.1 | 5-methyltetrahydropteroyltriglutamate                             | 49.9 | 0.00548 | 0.419 |
| NbS00054224g0001.1 | Putative acetyl co-enzyme A carboxylase carboxyltransferase alpha | 31.5 | 0.01596 | 0.414 |
| NbS00011338g0016.1 | GDLS-lipase 1                                                     | 23.5 | 0.01380 | 0.410 |
| NbS00051253g0012.1 | L-ascorbate oxidase homolog                                       | 21.9 | 0.02748 | 0.410 |
| NbS00014176g0002.1 | SBT2 protein precursor                                            | 18.5 | 0.00252 | 0.404 |
| NbS00002350g0011.1 | Acetolactate synthase, putative                                   | 20.6 | 0.01652 | 0.400 |
| NbS00028734g0015.1 | 20 kDa chaperonin                                                 | 28.9 | 0.00858 | 0.400 |
| NbS00028082g0012.1 | Cell division protein FtsZ homolog 1                              | 32.9 | 0.02782 | 0.399 |
| NbS00000066g0001.1 | Glutaredoxin domain-containing protein                            | 15.5 | 0.00256 | 0.397 |
| NbS00025596g0028.1 | DNA binding protein, putative                                     | 22.0 | 0.02440 | 0.396 |
| NbS00015088g0014.1 | Uncharacterized GPI-anchored protein                              | 23.0 | 0.03510 | 0.391 |
| NbS00054171g0002.1 | Protein SSUH2 homolog isoform X2                                  | 18.6 | 0.02262 | 0.366 |
| NbS00019202g0010.1 | Phi-1                                                             | 16.0 | 0.03576 | 0.362 |
| NbS00029129g0005.1 | Subtilisin-like protease                                          | 11.6 | 0.02488 | 0.350 |
| NbS00012311g0014.1 | Pyruvate kinase isozyme G                                         | 27.6 | 0.01404 | 0.337 |
| NbS00033024g0001.1 | Multicopper oxidase                                               | 6.9  | 0.00936 | 0.314 |
| NbS00002255g0005.1 | Senescence domain-containing protein                              | 35.0 | 0.03038 | 0.300 |
| NbS00023162g0005.1 | Non-cell-autonomous protein pathway 2                             | 7.7  | 0.04484 | 0.292 |
| NbS00025771g0014.1 | Probable polygalacturonase                                        | 21.2 | 0.00850 | 0.292 |
| NbS00032670g0016.1 | Cysteine protease                                                 | 23.5 | 0.00660 | 0.275 |
| NbS00055576g0008.1 | PsbP domain-containing protein 5                                  | 19.9 | 0.00648 | 0.263 |
| NbS00005913g0001.1 | Aspartic proteinase isoform 2                                     | 23.2 | 0.00312 | 0.238 |
| NbS00058562g0005.1 | DEAD-box ATP-dependent RNA helicase 3                             | 20.7 | 0.00796 | 0.238 |
| NbS00002190g0213.1 | Aspartic proteinase                                               | 12.6 | 0.00438 | 0.225 |
| NbS00032594g0011.1 | Dynamin-like protein ARC5                                         | 23.0 | 0.00038 | 0.217 |
| NbS00025772g0014.1 | 101 kDa heat shock protein                                        | 20.1 | 0.03572 | 0.211 |
| NbS00056252g0003.1 | Probable xyloglucan endotransglucosylase/hydrolase protein        | 42.7 | 0.00008 | 0.208 |

<sup>a</sup> Phytozome or NCBI gene accession number

<sup>b</sup> Phytozome or NCBI gene description

<sup>c</sup> The sequences coverage of targeted proteins

<sup>d</sup> The fold change of DAPs compared to PVX-GFP group
