# Supplementary material for: Sugarcane Streak Mosaic Virus P1 Attenuates Plant Antiviral Immunity and Enhances Potato Virus X Infection in Nicotiana benthamiana
Source: MDPI journal article supplement (doi:10.3390/cells11182870), 2022-09-14
Supplement: s1 [file s1]

**Supplementary Table S1 List of the specific pairs of primer corresponding to selected differentially abundant proteins for qRT-PCR in *Nicotiana benthamiana***

| Protein Name <sup>a</sup>                    | Protein ID <sup>b</sup> | Transcription ID <sup>c</sup> | Primer sequences (5'-3')                           | Length of PCR products (bp) | T <sub>m</sub> value (°C) <sup>d</sup> |
|----------------------------------------------|-------------------------|-------------------------------|----------------------------------------------------|-----------------------------|----------------------------------------|
| 5-epi-aristolochene synthase-like (EAS)      | NbS00004447g0101.1      | Niben101Scf03993g05005.1      | GGAAGGAAGACGGCTGATACG<br>CGCAGTTTGAGGTTGGTTGTA     | 124                         | 60                                     |
| Endochitinase A                              | NbS00023821g0011.1      | Niben101Scf07491g00003.1      | ATGGGGTTATTGCTGGCTTAG<br>CCACAAGGTCCGTAGTTATAGTTG  | 144                         | 58                                     |
| Aspartic proteinase (ASP)                    | NbS00002190g0213.1      | Niben101Scf04084g00005.1      | CCATTGCCTGCTTTGTACTTC<br>GCCCTTCATCACATGCTTTC      | 143                         | 57                                     |
| Xyloglucan endotransglucosylase (XTH1)       | NbS00056252g0003.1      | Niben101Scf00369g05011.1      | GCCCCATTTACTGCCTCCTA<br>GCCTTTTGATCCCACCATCT       | 113                         | 58                                     |
| PR-1 like (PR-1)                             | NbS00061216g0001.1      | Niben101Scf04053g02006.1      | ATGGGACAATAGGGTAGCGG<br>GGCGTTGAGTTGAGGGAAGG       | 127                         | 59                                     |
| Catalase (CAT)                               | NbS00013764g0007.1      | Niben101Scf14996g00009.1      | CTTCGATGATGTTTGTCTCCCG<br>GCTTTCCCCGCCTTGTTGAT     | 90                          | 62                                     |
| Glutathione S-transferase U9-like (GST )     | NbS00003017g0007.1      | Niben101Scf10254g01002.1      | AAGGTCCCTGTGCTTGTCCA<br>TAATTAGCCCAGAAACGAACATG    | 146                         | 58                                     |
| L-ascorbate oxidase                          | NbS00052235g0008.1      | Niben101Scf03026g01009.1      | TTGTGAACCCAATTATGAAGAACA<br>GACTCAATATGGCAATGGAAGG | 112                         | 59                                     |
| Lycopene beta cyclase                        | NbS00023329g0001.1      | Niben101Scf06266g00002.1      | GGTTCATCCCTCAACTGGTTAT<br>TCTATGGGCCACAAAATCTTTC   | 150                         | 58                                     |
| Cell division protein FtsZ                   | NbS00028082g0012.1      | Niben101Scf07163g00020.1      | TATTCGGTGCTGTTGTGGATG<br>TGATACCGTTCTTTCCGTAGTTC   | 158                         | 58                                     |
| PsbP domain-containing protein 5             | NbS00055576g0008.1      | Niben101Scf00777g04013.1      | GGTGAGCCCTATTGGTACTATGA<br>GGAAGAAGTCGGAAGATGCC    | 156                         | 58                                     |
| Dynamin-like protein ARC5 isoform            | NbS00032594g0011.1      | Niben101Scf08364g00011.1      | ATGTATTTCTGAGGCGTGTAGCA<br>CCGATTCTTATTGTGAGGGAC   | 137                         | 59                                     |
| Elongation factor 1 $\alpha$ (EF1 $\alpha$ ) | NbS00019623g0001.1      | Niben101Scf08618g01001.1      | TAAGATGATGCCGACCAAGC<br>TGTCCCTCACAGCAAAACGA       | 110                         | 58                                     |

<sup>a</sup> General proteins names<sup>b</sup> The accession number of *N. benthamiana* proteins database (<https://solgenomics.net/>)<sup>c</sup> The accession number of *N. benthamiana* transcripts database (<https://solgenomics.net/>)<sup>d</sup> The T<sub>m</sub> value of qRT-PCR used in the study
